# Supplementary material
Source: PubMed Central journal article supplement (PMC5464292)

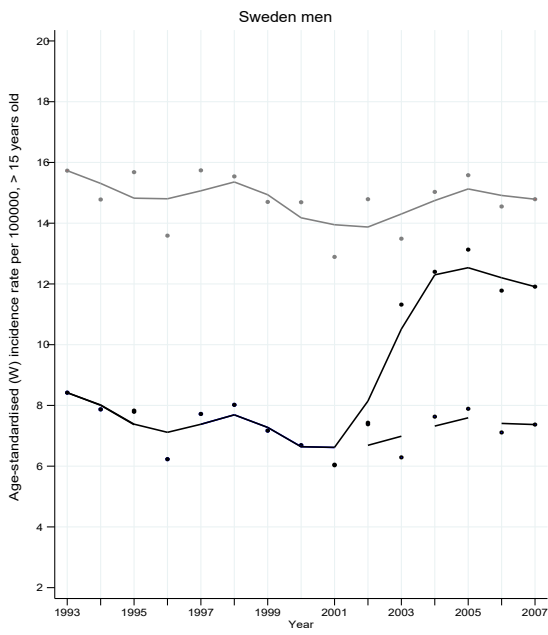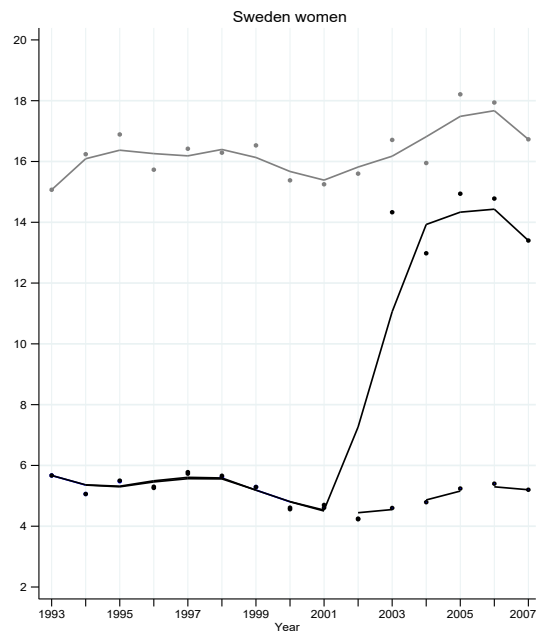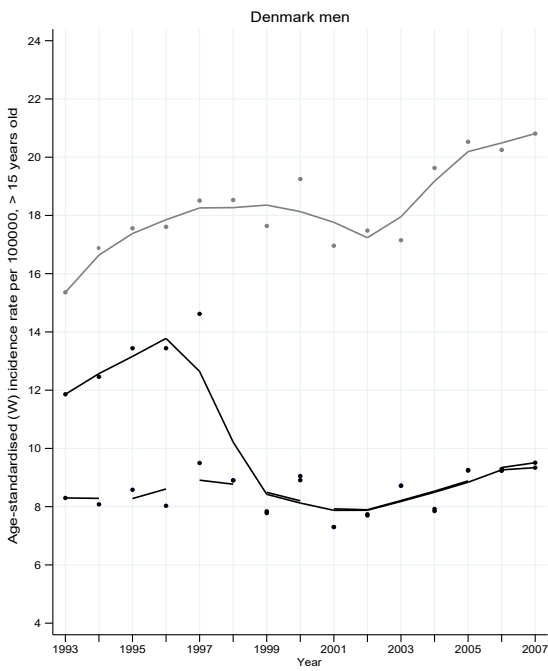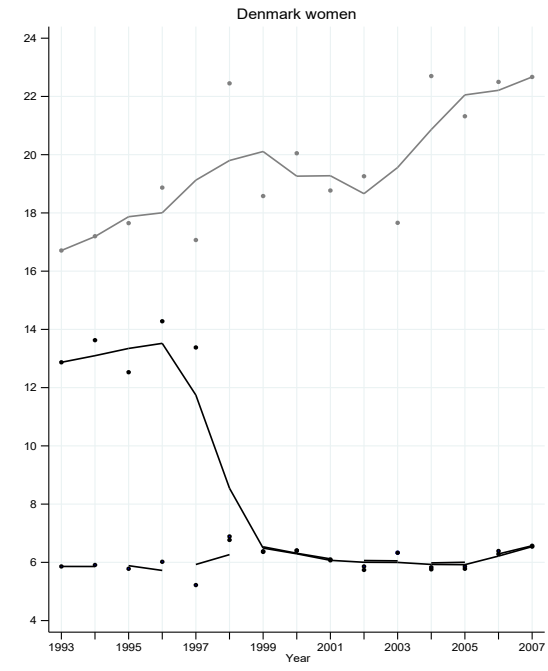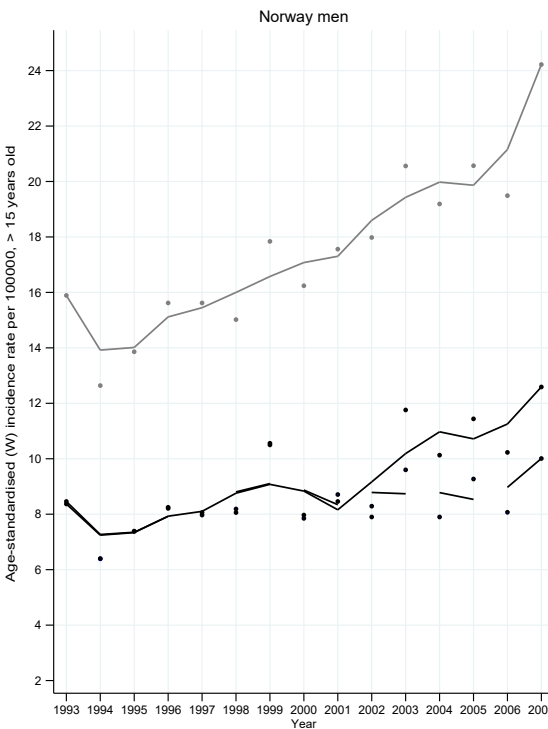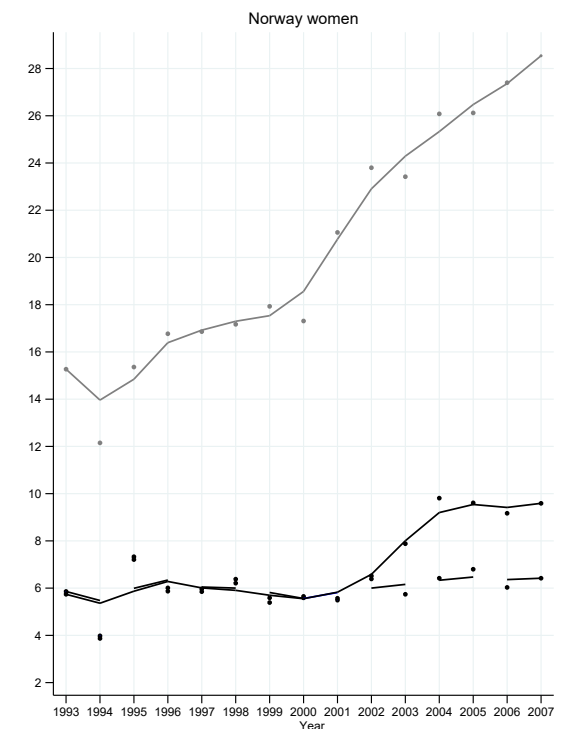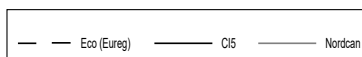

Supplement: now166_suppl_Supplementary_Figure_1.pdf [file now166_suppl_Supplementary_Figure_1.pdf]
